# Supplementary material for: Negative cross-resistance between structurally different Bacillus thuringiensis toxins may favor resistance management of soybean looper in transgenic Bt cultivars
Source: PubMed Central journal article supplement (PMC6336840; doi:10.1038/s41598-018-35965-5), 2019-01-17
Supplement: 41598_2018_35965_MOESM1_ESM.pdf [file 41598_2018_35965_MOESM1_ESM.pdf]

**Negative cross-resistance between structurally different *Bacillus thuringiensis* toxins may favor resistance management of soybean looper in transgenic Bt cultivars**

Nilson Rodrigues-Silva<sup>1,2,3</sup>, Afonso F. Canuto<sup>1</sup>, Diogo F. Oliveira<sup>1</sup>, André F. Teixeira<sup>1</sup>, Oscar F. Santos-Amaya<sup>1</sup>, Marcelo C. Picanço<sup>1</sup> & Eliseu J. G. Pereira<sup>1,2</sup>

<sup>1</sup>Department of Entomology, and <sup>2</sup>National Institute of Science and Technology in Plant-Pest Interactions, Universidade Federal de Viçosa, Viçosa, MG, 36570-900, Brazil. <sup>3</sup>Campus do Sertão, Universidade Federal de Sergipe, Nossa Senhora da Glória, SE, 49680-000, Brazil.

**Supplementary information**

**Table S1.** Summary of the susceptibility profile obtained in the diet-surface Cry1Ac bioassays against larvae of a soybean looper a population selected for resistance to Cry1Ac using the Bt toxin on the artificial diet.

| Generation of selection | Slope $\pm$ SE  | Cry1Ac LC <sub>90</sub> (95% FL) | $\chi^2$ | <i>P</i> |
|-------------------------|-----------------|----------------------------------|----------|----------|
| 1                       | 2.15 $\pm$ 0.19 | 215.7 (176.7 - 276.8)            | 4.73     | 0.450    |
| 2                       | 1.82 $\pm$ 0.21 | 535.0 (288.6 - 1768.1)           | 7.70     | 0.173    |
| 3                       | 2.74 $\pm$ 0.32 | 1568.4 (1180.3 - 2378.5)         | 1.33     | 0.931    |
| 4                       | 3.20 $\pm$ 0.41 | 1868.2 (1410.6 - 2711.7)         | 1.21     | 0.943    |
| 5                       | 3.12 $\pm$ 0.42 | 3003.6 (2276.3 - 4469.0)         | 1.85     | 0.763    |
| 6                       | 2.38 $\pm$ 0.27 | 4057.9 (2457.5 - 10716.0)        | 8.52     | 0.130    |
| 7                       | Nd              | > 2000                           | Nd       | Nd       |

In the column head, LC<sub>90</sub> is the lethal concentration (ng/cm<sup>2</sup>) that causes 90% mortality of the population and its 95% fiducial limits, estimated through probit analysis using Polo-Plus.  $\chi^2$  is the chi-square statistic with its *P* value for the goodness-of-fit to the probit model. Nd, not determined due to insufficient concentration-response (i.e., the range toxin concentration tested, up to 2000 ng/cm<sup>2</sup>, did not cause mortality to estimate the regression line).
